# Supplementary material
Source: PubMed Central journal article supplement (PMC2668009)
Supplement: mmc1.pdf [file mmc1.pdf]

## Supplemental Data

### Genome-wide Linkage Scan Reveals

#### Three Putative Breast-Cancer-Susceptibility Loci

Juan Manuel Rosa-Rosa, Guillermo Pita, Miguel Urioste, Gemma Llort, Joan Brunet, Conxi Lázaro, Ignacio Blanco, Teresa Ramón y Cajal, Orland Díez, Miguel de la Hoya, Trinidad Caldés, Maria-Isabel Tejada, Anna González-Neira, and Javier Benítez

**Table S1: Different combinations of the genotyped members of the BRCA positive families used to calculate the power in linkage detection.**

| Family | Gene         | Combination* | Individual     | Status          | HLOD         |          |  |
|--------|--------------|--------------|----------------|-----------------|--------------|----------|--|
| 698    | <i>BRCA2</i> | Original     | 05S1262        | affected        | 0.50         |          |  |
|        |              |              | 05S1263        | unaffected      |              |          |  |
|        |              |              | 05S1264        | unaffected      |              |          |  |
|        |              |              | 04S137         | affected        |              |          |  |
|        |              |              | 05S1261        | affected        |              |          |  |
|        |              | 1            | 05S1262        | affected        | 0.44         |          |  |
|        |              |              | 04S137         | affected        |              |          |  |
|        |              |              | 05S1261        | affected        |              |          |  |
|        |              | 2            | 05S1262        | affected        | 0.46         |          |  |
|        |              |              | 05S1263        | unaffected      |              |          |  |
|        |              |              | 04S137         | affected        |              |          |  |
|        |              | 3            | 05S1262        | affected        | 0.46         |          |  |
|        |              |              | 04S137         | affected        |              |          |  |
|        |              |              | 05S1264        | unaffected      |              |          |  |
|        |              | 4            | 05S1262        | affected        | <b>-0.76</b> |          |  |
|        |              |              | <b>05S1264</b> | <b>affected</b> |              |          |  |
| 04S137 | affected     |              |                |                 |              |          |  |
| 752    | <i>BRCA1</i> | Original     | 05S1377        | unaffected      | 0.62         |          |  |
|        |              |              | 04S439         | affected        |              |          |  |
|        |              |              | 05S1379        | unaffected      |              |          |  |
|        |              |              | 05S1374        | affected        |              |          |  |
|        |              |              | 05S1375        | affected        |              |          |  |
|        |              | 1            | 05S1380        | affected        | 0.28         |          |  |
|        |              |              | 04S439         | affected        |              |          |  |
|        |              |              | 05S1374        | affected        |              |          |  |
|        |              | 2            | 05S1375        | affected        | 0.28         |          |  |
|        |              |              | 04S439         | affected        |              |          |  |
|        |              | 3            | 05S1374        | affected        | 0.28         |          |  |
|        |              |              | 05S1380        | affected        |              |          |  |
|        |              |              | 05S1375        | affected        |              |          |  |
|        |              |              |                |                 | 05S1380      | affected |  |

|     |              |          |                |                 |             |
|-----|--------------|----------|----------------|-----------------|-------------|
|     |              |          | 04S439         | affected        |             |
|     |              | 4        | 05S1375        | affected        | 0.25        |
|     |              |          | 05S1380        | affected        |             |
|     |              |          | 04S439         | affected        |             |
|     |              | 5        | <b>05S1379</b> | <b>affected</b> | <b>0.04</b> |
|     |              |          | 05S1375        | affected        |             |
|     |              |          | 05S1380        | affected        |             |
|     |              | 6        | 04S439         | affected        | 0.25        |
|     |              |          | 05S1374        | affected        |             |
|     |              |          | 05S1380        | affected        |             |
|     |              | Original | 05S138         | affected        | 0.08        |
|     |              |          | 05S139         | affected        |             |
|     |              |          | 05S1413        | affected        |             |
|     |              |          | 05S1414        | affected        |             |
|     |              | 1        | 05S138         | affected        | 0.26        |
|     |              |          | 05S139         | affected        |             |
|     |              |          | 05S1413        | affected        |             |
| 921 | <i>BRCA2</i> | 2        | 05S138         | affected        | -0.60       |
|     |              |          | 05S139         | affected        |             |
|     |              |          | 05S1414        | affected        |             |
|     |              | 3        | 05S138         | affected        | 0.24        |
|     |              |          | 05S1413        | affected        |             |
|     |              |          | 05S1414        | affected        |             |
|     |              | 4        | 05S139         | affected        | -0.20       |
|     |              |          | 05S1413        | affected        |             |
|     |              |          | 05S1414        | affected        |             |

The pedigrees from the three *BRCA* positive families are represented in Figure 1. In this table we present different combinations (\*) used to calculate the maximum HLOD score for each family. For example, in family 698 the combination “original” represents the pedigree used to calculate the HLOD score (shown in the last column, in this case 0.50) using all the genotyped members of this family. In the same family, combination “1” represents the hypothetical case in which only these 3 members from the family were genotyped, obtaining a HLOD score = 0.44. With the combination “4” of family 698 and the combination “5” of family 752 we simulated the phenocopy effect (affected but not mutation carrier individual), and the effect in the HLOD score is notable (highlighted in **bold**). In **bold and red**, we highlight the effect in the HLOD score of the randomness in the genotypes, e.g., the homozygous genotypes on some markers in some individuals could mask the linkage signal. The column *Status* represents the status parameter used for Merlin software.

**Table S2: Information of all the STR markers used for the fine-mapping in the three candidate regions.**

| <b>Chromosome</b> | <b>Marker</b> | <b>Position Mb</b> | <b>Size bp</b> | <b>Expected Heterozygosity</b> | <b>Observed Heterozygosity</b> | <b>Singlepoint HLOD</b> |
|-------------------|---------------|--------------------|----------------|--------------------------------|--------------------------------|-------------------------|
| 3                 | D3S3575       | 160.83             | 204-226        | 0.79                           | 0.79                           | 0.206                   |
|                   | D3S3702       | 164.88             | 209-229        | 0.81                           | 0.77                           | 0.692                   |
|                   | D3S3712       | 168.45             | 179-209        | 0.77                           | 0.82                           | 2.166                   |
|                   | D3S1229       | 171.85             | 110-128        | 0.84                           | 0.86                           | 1.036                   |
| 6                 | D6S1703       | 146.05             | 135-159        | 0.77                           | 0.80                           | 0.975/1.499             |
|                   | D6S311        | 148.73             | 219-265        | 0.93                           | 0.91                           | 1.410/1.735             |
|                   | D6S1654       | 149.62             | 257-279        | 0.82                           | 0.81                           | 0.545/1.130             |
|                   | D6S1687       | 151.06             | 126-144        | 0.66                           | 0.41                           | 0.637/0.306             |
|                   | D6S420        | 152.51             | 174-194        | 0.66                           | 0.72                           | 0.848/0.523             |
| 21                | D21S1921      | 35.34              | 196-214        | 0.81                           | 0.81                           | 0.118                   |
|                   | D21S1252      | 36.74              | 226-254        | 0.80                           | 0.86                           | 1.449                   |
|                   | D21S267       | 37.38              | 177-199        | 0.88                           | 0.76                           | 2.092                   |
|                   | D21S1883      | 38.42              | 227-239        | 0.73                           | 0.73                           | 0.640                   |

Singlepoint values are extracted from only putative linked families. For the markers located on chromosome 6, singlepoint values are shown for 7/5 (before/after fine-mapping data) putative linked families. We ruled out two families in chromosome 6 because the haplotypal segregation was disrupted when STR markers were added (see Supp. Figure 1).

**Table S3: Results of linkage analysis using three different subgroups of families.**

| <b>Subgroup</b> | <b>Number of families</b> | <b>Chromosome</b> | <b>HLOD</b> |
|-----------------|---------------------------|-------------------|-------------|
| Bilaterality    | 13                        | 3                 | 3.13        |
|                 |                           | 12                | 1.78        |
| ≤ 50 years      | 21                        | 21                | 2.40        |
|                 |                           | 6                 | 1.31        |
|                 |                           | 3                 | 1.22        |
| ≥ 4 BC cases    | 23                        | 3                 | 2.78        |
|                 |                           | 6                 | 1.78        |
|                 |                           | 21                | 1.37        |

Results from the three subgroups of families, families with members affected by bilateral breast cancer, families with mean age lower or equal than 50 years and families with 4 or more breast cancer cases, are represented in this table. We would like to highlight the HLOD score obtained from the subset of bilateral families in chromosome 3 (HLOD=3.13).

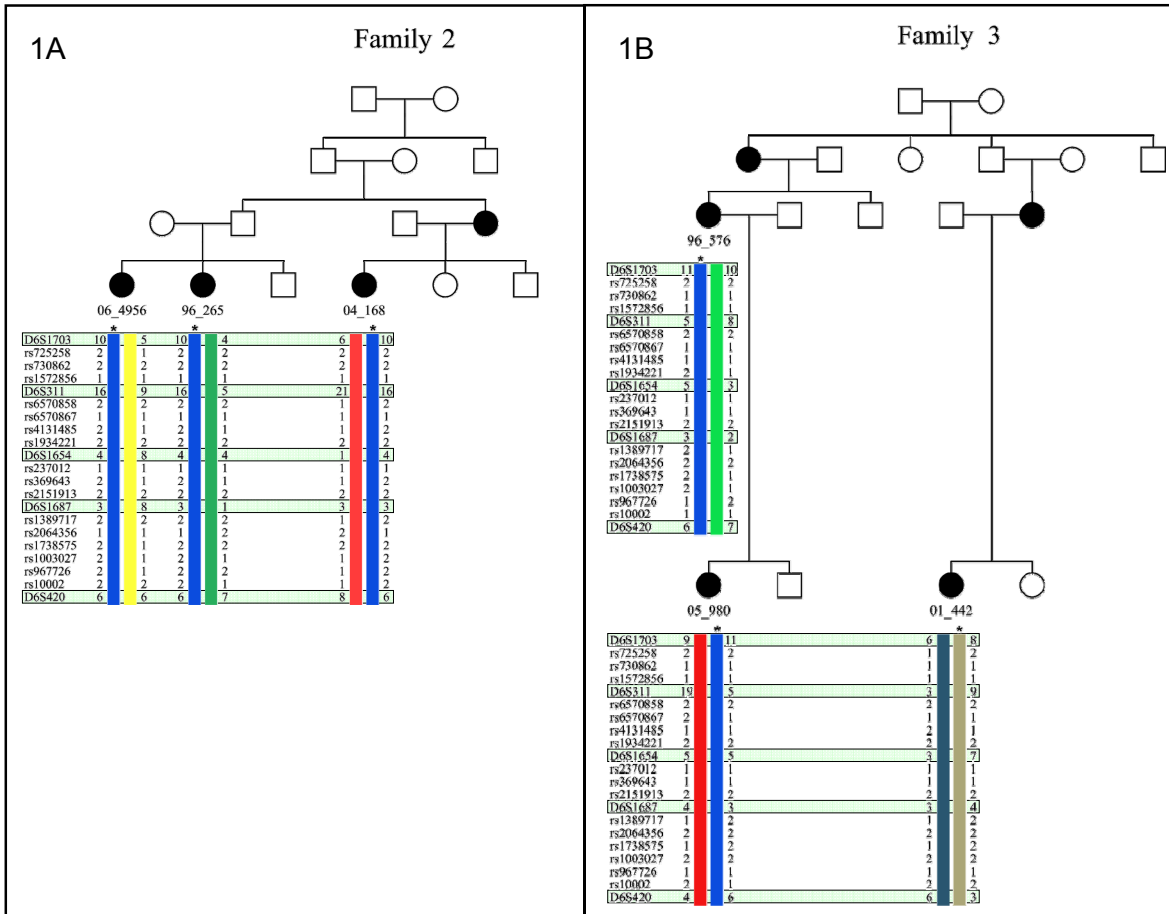

**Figure S1: Fine Mapping: Representation of the pedigrees of two families identified by SNP markers as putative linked to region on chromosome 6. We used five STR markers to confirm the segregation of the shared haplotypes identified by SNP markers. In Family 2 (1A) the segregation is confirmed whereas in Family 3 (1B) the segregation is ruled out. STR markers are shaded in light green.**
